# Supplementary material
Source: publisher figshare collection journal article supplement (https://geolsoc.figshare.com/ndownloader/files/26674124)
Supplement: Supplementary file 1 [file 26674124]

## Sheet: Sheet1
Table S2 Compilation of Mo enrichments in euxinic black shales in this study
Sample	Lithology	Height	TOC	Fecarb	Feox	Femag	Fepy	FeHR	FeT	FeHR/FeT	Fepy/FeHR	Mo	MoEF	Mo/TOC	Redox
		(m)	(%)	(%)	(%)	(%)	(%)	(%)	(%)			(ppm)		(ppm/%)
1. Jiulongwan section (Li et al., 2010; Och et al., 2016; this study*)
JLW40	Black shale	12	0.78	0.6	0.03	0.01	4.02	4.66	4.82	0.97	0.86	0.14	0.1	0.179487	euxinic
HN07-23	Black shale	11.9	15.05	0.202754	0.115025	0.0449553	1.92443	2.28716	3.2564	0.702359	0.841404	180.733	170.687	12.0088	euxinic
JLW43	Black shale	10.35	5	0.56	0.01	0	1.78	2.35	2.34	1	0.76	92.51	123.491	18.502	euxinic
HN07-21	Black shale	10	5.18	0.0745558	0.0163391	0.0238908	1.01882	1.1336	2.69701	0.420318	0.898742	136.038	138.269	26.2622	euxinic
JLW44	Black shale	9.85	5.9	0.54	0.04	0.03	1.92	2.53	2.34	1	0.76	120.76	133.954	20.4678	euxinic
JLW45	Black shale	9.35	5.48	0.63	0.06	0.02	2.27	2.98	2.75	1	0.76	83.45	90.9349	15.2281	euxinic
JLW46	Black shale	8.75	5.36	0.53	0.01	0.01	1.85	2.4	2.41	0.99	0.77	197.36	220.35	36.8209	euxinic
JLW47	Black shale	8.25	5.94	0.59	0.02	0.01	1.88	2.5	2.38	1	0.75	246.86	292.732	41.5589	euxinic
JLW48	Black shale	7.75	5.5	0.6	0.05	0.01	1.86	2.52	2.49	1	0.74	119.94	147.266	21.8073	euxinic
JLW49	Black shale	7.15	5.39	0.53	0.03	0.01	2.07	2.64	2.45	1	0.78	69.12	84.737	12.8237	euxinic
HN07-18	Black shale	7	6.44	0.0621519	0.0313639	0.0125409	0.966568	1.07262	2.30195	0.465964	0.901124	111.422	115.943	17.3015	euxinic
JLW50	Black shale	6.45	4.49	0.52	0.01	0.01	2.11	2.65	2.5	1	0.8	112.17	86.5627	24.9822	euxinic
JLW51	Black shale	6.05	4.48	0.53	0.03	0.01	2.22	2.79	2.71	1	0.8	90.32	89.4172	20.1607	euxinic
JLW52	Black shale	5.45	4.21	0.56	0.05	0.01	2.24	2.86	3.04	0.94	0.78	92.1	99.4556	21.8765	euxinic
JLW53	Black shale	4.65	4.28	0.61	0.02	0.01	3.19	3.83	3.58	1	0.83	174.88	196.448	40.8598	euxinic
JLW54	Black shale	4.25	4.27	0.8	0.09	0.01	3.05	3.95	3.86	1	0.77	162.1	173.883	37.9625	euxinic
HN07-15	Black shale	4	4.95	0.0530823	0.0123614	0.0187205	1.38454	1.46871	2.71496	0.540969	0.942695	161.322	140.892	32.5904	euxinic
JLW55	Black shale	3.75	5.24	0.54	0.03	0	2.29	2.86	2.97	0.97	0.8	65.38	71.0897	12.4771	euxinic
JLW56	Black shale	3.15	5.38	0.69	0.16	0.03	2.39	3.27	3.25	1	0.73	16.56	39.6652	3.07807	euxinic
JLW58	Black shale	2.3	4.61	0.62	0.03	0.01	2.38	3.04	2.94	1	0.78	76.62	54.1894	16.6204	euxinic
HN07-13	Black shale	2.05	4.76	0.0500352	0.00863819	0.0140388	1.01011	1.08282	2.92886	0.369707	0.932849	71.8125	61.9065	15.0867	euxinic
HN07-09	Black shale	2	4.6386	0.0905718	0.112543	0.0153803	1.94533	2.16382	2.83829	0.762368	0.899024	113.939	147.698	24.5631	euxinic
HN07-12	Black shale	1	5.1018	0.0955037	0.0683602	0.0122076	2.12123	2.2973	3.05279	0.752524	0.923357	125.094	112.325	24.5196	euxinic
HN07-11	Black shale	0.2	1.9801	0.0709344	0.0570856	0.0117891	2.08988	2.22969	3.20194	0.696355	0.937296	121.685	89.5768	61.454	euxinic
JLW60	Black shale	0	2.03	0.47	0.01	0.02	1.14	1.64	2.31	0.71	0.69	367.28	326.428	180.926	euxinic
2. Three George core #1 (Kendall et al., 2015)
40, 4 of 12	Black shale	5.762							1.1			48	142.933
S104012	Black shale	5.132	8.9	﻿0.1	0.1	0	1.3	1.5	﻿1.7	0.92	0.87	104	179.819	11.6854	euxinic
S104103	Black shale	4.792	1.3	﻿0.1	0.1	0	0.6	0.8			0.82	25		19.2308	euxinic
S104106	Black shale	4.442	8.6	﻿0.1	0.1	0	0.4	0.6	﻿0.6	1	0.74	27	120.6	3.13953	euxinic
41, 11 of 14	Black shale	3.962		﻿0.3	0.1	0	1.8	2.2	﻿2.8	0.76	0.83	95	124.195		euxinic
41, 13 of 14	Black shale	3.852		﻿0.4	0.1	0	2.3	2.8	﻿3.4	0.83	0.82	127	130.908		euxinic
S104206-A1	Black shale	2.192	4.4	﻿0.0	0.1	0	1.8	1.9	﻿2.9	0.65	0.94	71	73.1846	16.1364	euxinic
S104206-A2	Black shale	2.162	3.6	﻿0.1	0.1	0	2.2	2.4	﻿2.9	0.81	0.94	145	149.462	40.2778	euxinic
42, 6 of 7, 1	Black shale	1.902		﻿0.1	0.1	0	1.8	2	﻿2.4	0.82	0.93	102	111.576		euxinic
42, 6 of 7, 6	Black shale	1.702										261	317.945		euxinic
S104301B	Black shale	1.362	3	﻿0.0	0.1	0	1.8	1.9	﻿2.9	0.66	0.94	164	141.781	54.6667	euxinic
S104304	Black shale	0.872	3.1	﻿0.0	0.1	0	2.6	2.7	﻿3.1	0.86	0.96	58	47.103	18.7097	euxinic
43, 4 of 6, A-1	Black shale	0.782										210	234.5		euxinic
S104306	Black shale	0.632	2.9	﻿0.0	0.1	0	2.1	2.2	﻿3.0	0.74	0.94	44	35.2	15.1724	euxinic
43, 6 of 6	Black shale	0.612		﻿0.0	0.1	0	3.2	3.3	﻿2.9	1	0.97	125	113.559		euxinic
S104401	Black shale	0.532	3.2	﻿0.1	0.1	0	2.5	2.7	﻿2.8	0.94	0.93	73	64.1443	22.8125	euxinic
S104402	Black shale	0.362	2.7	﻿0.1	0.1	0	2	2.2	﻿3.0	0.73	0.94	94	76.3394	34.8148	euxinic
44, 3 of 3	Black shale	0.002										77	72.407
3. Rongxi (Sahoo, 2015)
RX09-57.0	Black shale	0.9	3.2	0.1	0	0.1	0.5	0.7	0.53	1.17	0.74	72	59.0995	22.5	euxinic
RX09-57.6	Black shale	1.5	4.1	0.2	0.2	0.1	1.5	2	2.81	0.73	0.75	95	90.1239	23.1707	euxinic
RX09-58.8	Black shale	2.7	6.8	0.1	0.1	0.2	2	2.4	2.86	0.85	0.82	69	64.0971	10.1471	euxinic
RX09-60.2	Black shale	4.1	11.3	0.2	0.1	0.3	1.6	2.2	2.58	0.84	0.74	35	45.9804	3.09735	euxinic
RX09-61.2	Black shale	5.1	11.7	0.2	0.2	0.2	1.6	2.2	2.06	1	0.72	47	56.6112	4.01709	euxinic
4. Wuhe (Sahoo et al., 2016)
WH09-114.5	Black shale	0.2	1.1387	0.00924393	0	0.00598037	0.679542	0.694766	0.998981	0.695475	0.978087	1.51545	2.88089	1.33086	euxinic
WH09-115.3	Black shale	1	3.7639	0.0704194	0	0.00893092	1.39429	1.47364	2.46979	0.596665	0.946153	68.035	51.4317	18.0757	euxinic
WH09-115.5	Black shale	1.2	1.4506	0.102271	0.0179746	0.0657455	1.61892	1.80491	2.4515	0.736246	0.896953	75.6685	54.9042	52.1636	euxinic
WH09-115.9	Black shale	1.6	2.8979	0.105456	0.0157199	0.0606862	1.55122	1.73308	2.3911	0.724805	0.895065	126.007	84.6624	43.482	euxinic
WH09-116.3	Black shale	2	1.932	0.152587	0	0.0468592	1.03352	1.23297	1.8979	0.649651	0.838239	65.5912	49.435	33.9499	euxinic
WH09-116.8	Black shale	2.5	5.0124	0.0907588	0.0117127	0.0597867	1.15768	1.31994	1.80226	0.732381	0.877072	79.0618	74.7728	15.7732	euxinic
WH09-117.4	Black shale	3.1	5.2445	0.14064	0.00427762	0.0715058	2.43954	2.65596	3.18981	0.83264	0.918514	95.1156	97.147	18.1363	euxinic
WH09-117.8	Black shale	3.5	8.5428	0.137563	0	0.00501419	2.14392	2.28649	3.43418	0.665806	0.937644	61.4239	63.5634	7.19013	euxinic
WH09-118.3	Black shale	4	9.3276	0.168264	0	0.0421762	1.99791	2.20835	2.63093	0.839381	0.904707	34.1751	51.0128	3.66387	euxinic
WH09-118.9	Black shale	4.6	6.9778	0.150804	0	0.00988393	1.0791	1.23979	1.34582	0.921213	0.870391	35.3963	95.757	5.0727	euxinic
WH09-119.5	Black shale	5.2	7.0573	0.152282	0	0.040147	1.0835	1.27593	1.45356	0.877793	0.849185	32.9745	74.3157	4.6724	euxinic
WH09-120.0	Black shale	5.7	4.0987	0.0795945	0	0	0.486106	0.5657	0.844982	0.669482	0.859299	22.339	53.1027	5.45026	euxinic
5. Sandu section (this study*)
DST-0	Black shale	5.7	0.86*	0.15*	0.02*	0.00*	1.51*	1.71*	1.69*	0.99*	0.89*	0.85*	0.43*	0.99*	euxinic
DST-1	Black shale	4.7	1.03*	0.12*	0.01*	0.00*	0.63*	0.90*	0.77*	0.85*	0.82*	0.35*	0.24*	0.34*	euxinic
DST-2	Black shale	2.7	1.07*	0.19*	0.01*	0.00*	0.48*	0.83*	0.69*	0.83*	0.70*	0.24*	0.16*	0.22*	euxinic
DST-3	Black shale	1.2	1.32*	0.32*	0.03*	0.00*	1.92*	2.30*	2.27*	0.99*	0.85*	2.15*	1.29*	1.62*	euxinic
DST-4	Black shale	0.3	2.25*	0.30*	0.03*	0.00*	2.78*	2.96*	3.11*	1.00*	0.89*	5.27*	2.90*	2.34*	euxinic
6. Jinjiadong (Huang et al., 2017)
JJD18	Black shale	2.7	2.58	0	0.22	0.06	0.67	0.95	2.33	0.41	0.71	4.79	5.09413	1.85659	euxinic
JJD20	Black shale	3.8	9.08	0.28	0.67	0.1	4.01	5.06	5.15	0.98	0.79	26.99	24.645	2.97247	euxinic
JJD21	Black shale	4.4	5.48	0.02	0.81	0.15	2.98	3.95	5.5	0.72	0.75	11.81	14.0048	2.15511	euxinic
JJD22	Black shale	5.2	4.76	0.05	0.44	0.07	1.94	2.51	3.02	0.83	0.77	4.56	10.6268	0.957983	euxinic
HRM-3 (Kurzweil et al., 2015)
HRM-3-21	Black shale	21	2.4									50.7	50.59	21.125	euxinic
HRM-3-27	Black shale	27	2.1									30.8	23.6678	14.6667	euxinic
HRM-3-33	Black shale	33	2.5									39.6	33.7032	15.84	euxinic
HRM-3-48	Black shale	48	2.9									51.1	46.0444	17.6207	euxinic
HRM-3-55	Black shale	55	4.9									209.3	273.521	42.7143	euxinic
HRM-3-73	Black shale	73	0.3									54.7	68.9913	182.333	euxinic
HRM-3-85	Black shale	85	3.1									153.6	272.922	49.5484	euxinic
HRM-3-96	Black shale	96	1.3									81.5	150.352	62.6923	euxinic
HRM-3-119	Black shale	119	1.9									93.6	119.997	49.2632	euxinic
HRM-3-161	Black shale	161	0.5									2.5	1.65815	5	euxinic
HRM-3-166	Black shale	166	1.4									26.2	27.3278	18.7143	euxinic
HRM-3-190	Black shale	190	2.3									39.7	32.1922	17.2609	euxinic
HRM-3-206	Black shale	206	2.2									39.6	35.1506	18	euxinic
HRM-3-216	Black shale	216	0.5									2.4	1.50976	4.8	euxinic
HRM-3-240	Black shale	240	4.1									85.2	92.8852	20.7805	euxinic
HRM-3-265	Black shale	265	3.9									63.5	69.3024	16.2821	euxinic
HRM-3-268	Black shale	268	3.2									69.2	66.0562	21.625	euxinic
KA-5 (Kurzweil et al., 2015)
﻿KA-5-13	Black shale	13.4	0.3									58.1	980.726	193.667	euxinic
KA-5-18	Black shale	17.5	1.9									113.4	222.58	59.6842	euxinic
KA-5-20	Black shale	20.2	1.6									37.9	38.812	23.6875	euxinic
KA-5-28	Black shale	27.9	1.7									68.6	50.9743	40.3529	euxinic
KA-5-30	Black shale	30.2	0.4									2.8	2.30743	7	euxinic
KA-5-39	Black shale	38.9	1.9									98.6	79.0046	51.8947	euxinic
KA-5-40	Black shale	39.5	2									65.3	53.4214	32.65	euxinic
KA-5-45	Black shale	44.9	1.9									87.6	67.5713	46.1053	euxinic
KA-5-45.5	Black shale	45.4	2.7									151.7	129.546	56.1852	euxinic
KA-5-46	Black shale	45.9	2.5									132.2	123.176	52.88	euxinic
KA-5-72	Black shale	75.2	2.1									118.4	107.644	56.381	euxinic
KA-5-77	Black shale	76.8	0.4									10.4	11.5242	26	euxinic
References
Li, C., Love, G.D., Lyons, T.W., Fike, D.A., Sessions, A.L., Chu, X., 2010. A stratified redox model for the Ediacaran ocean. Science 328, 80-83.
Och, L.M., Cremonese, L., Shields-Zhou, G.A., Poulton, S.W., Struck, U., Ling, H., Li, D., Chen, X., Manning, C., Thirlwall, M., Strauss, H., Zhu, M., 2016.
Palaeoceanographic controls on spatial redox distribution over the Yangtze Platform during the Ediacaran-Cambrian transition. Sedimentology 63, 378-410.
Sahoo, S.K., 2015. Ediacaran ocean redox evolution. Ph. D thesis. University of Nevada, Las Vegas.
Sahoo, S.K., Planavsky, N.J., Kendall, B., Wang, X., Shi, X., Scott, C., Anbar, A.D., Lyons, T.W., Jiang, G., 2012. Ocean oxygenation in the wake of the Marinoan
glaciation. Nature 489, 546-549.
Huang, J., Feng, L., Chu, X., Sun, T., Wen, H., Qin, L., Shen, Y., 2017. A predominantly ferruginous condition in the Ediacaran deep ocean: geochemistry of black shales in the Ediacaran Doushantuo Formation, South China. Precambrian Research 295, 12-23.
Kurzweil, F., Drost, K., Pašava, J., Wille, M., Taubald, H., Schoeckle, D., Schoenberg, R., 2015. Coupled sulfur, iron and molybdenum isotope data from black shales of the Teplá-Barrandian unit argue against deep ocean oxygenation during the Ediacaran. Geochimica et Cosmochimica Acta 171, 121-142.
